# Supplementary material
Source: PubMed Central journal article supplement (PMC4790590)
Supplement: tomc002253.wt2_default.pdf [file tomc002253.wt2_default.pdf]

**Web table 2: Risk of bias in included studies**

| <b>Study</b>                        | <b>Eligibility criteria</b> | <b>Method of randomisation</b> | <b>Allocation of concealment</b> | <b>Similarity at baseline</b> | <b>Intention-to-treat analysis</b> | <b>Withdrawals</b> | <b>Cointerventions constant</b> | <b>Credible placebo</b> | <b>Blinded assessors</b> |
|-------------------------------------|-----------------------------|--------------------------------|----------------------------------|-------------------------------|------------------------------------|--------------------|---------------------------------|-------------------------|--------------------------|
| <b>General Physiotherapy trials</b> |                             |                                |                                  |                               |                                    |                    |                                 |                         |                          |
| Chandler 1999 [25]                  | Low                         | Unclear                        | Unclear                          | Unclear                       | Unclear                            | High               | Unclear                         | Unclear                 | High                     |
| Ellis 2005 [26]                     | Low                         | Low                            | High                             | Low                           | Unclear                            | High               | Unclear                         | Unclear                 | Low                      |
| Fisher 2008 (M) [27]                | Low                         | High                           | High                             | Low                           | Unclear                            | Unclear            | Low                             | Low                     | Low                      |
| Homann 1998 [28]                    | Low                         | Low                            | Low                              | Unclear                       | Unclear                            | Unclear            | Low                             | Unclear                 | Unclear                  |
| Keus 2007 [29]                      | Low                         | Low                            | Unclear                          | Low                           | Low                                | Low                | Unclear                         | Unclear                 | Low                      |
| Stack 2012 [30]                     | Low                         | Unclear                        | Unclear                          | Low                           | Unclear                            | High               | Unclear                         | Unclear                 | Low                      |
| Talakad 2011 (M) [31]               | Unclear                     | Unclear                        | Unclear                          | Unclear                       | Unclear                            | Unclear            | Unclear                         | Unclear                 | Unclear                  |
| <b>Exercise trials</b>              |                             |                                |                                  |                               |                                    |                    |                                 |                         |                          |
| Allen 2010 [32]                     | Low                         | Low                            | Unclear                          | Low                           | Low                                | Low                | Unclear                         | Low                     | Low                      |
| Ashburn 2007 [33]                   | Low                         | Low                            | Low                              | Low                           | Low                                | Low                | Unclear                         | Low                     | Unclear                  |
| Boehm 2011 [34]                     | Low                         | Unclear                        | Unclear                          | Low                           | High                               | Low                | Low                             | Unclear                 | Low                      |
| Cerri 1994 [35]                     | Low                         | Unclear                        | Unclear                          | Unclear                       | Unclear                            | Unclear            | Unclear                         | Unclear                 | Unclear                  |
| Goodwin 2009 [36]                   | Low                         | Low                            | Low                              | Low                           | Low                                | Low                | Unclear                         | Unclear                 | High                     |
| Klassen 2007 [37]                   | Low                         | Unclear                        | Unclear                          | Low                           | Unclear                            | High               | Unclear                         | Unclear                 | Low                      |
| Mak 2008 (M) [38]                   | Low                         | High                           | High                             | Low                           | Unclear                            | High               | Low                             | Unclear                 | Low                      |
| Meek 2010 [39]                      | Low                         | Low                            | Low                              | Low                           | Low                                | Low                | Unclear                         | Unclear                 | Low                      |
| Sage 2009 [40]                      | Low                         | Unclear                        | Unclear                          | Low                           | Low                                | High               | Low                             | Unclear                 | Low                      |
| Schenkman 1998 [41]                 | Low                         | Low                            | Low                              | Low                           | Unclear                            | Low                | Low                             | Unclear                 | Low                      |
| Schilling 2008 [42]                 | Low                         | Unclear                        | Unclear                          | Low                           | Unclear                            | High               | Unclear                         | Unclear                 | Unclear                  |
| Stozek 2003 [43]                    | Low                         | Unclear                        | Unclear                          | Low                           | Unclear                            | Unclear            | Unclear                         | Unclear                 | Unclear                  |
| Taheri 2011 [44]                    | Low                         | Unclear                        | Unclear                          | Unclear                       | Unclear                            | Unclear            | Low                             | Unclear                 | Unclear                  |
| Thaut 1996 (M) [45]                 | Low                         | High                           | Unclear                          | Low                           | Unclear                            | Unclear            | Low                             | Unclear                 | Unclear                  |
| <b>Treadmill trials</b>             |                             |                                |                                  |                               |                                    |                    |                                 |                         |                          |

|                            |         |         |         |         |         |         |         |         |         |
|----------------------------|---------|---------|---------|---------|---------|---------|---------|---------|---------|
| Cakit 2007 [46]            | Low     | Unclear | Unclear | Unclear | Unclear | High    | Low     | Unclear | Low     |
| Canning 2008 [47]          | Low     | High    | High    | Low     | Low     | Low     | Unclear | Unclear | Low     |
| Fisher 2008 (M) [27]       | Low     | High    | High    | Low     | Unclear | Unclear | Low     | Low     | Low     |
| Ganesen 2010 [48]          | Unclear |
| Kurtais 2008 [49]          | Low     | Unclear | Unclear | Low     | Unclear | High    | Low     | Unclear | Low     |
| Protas 2005 [50]           | Low     | Unclear | Unclear | Low     | Unclear | Unclear | Low     | Unclear | Low     |
| Shankar 2009 [51]          | Unclear | Low     | Low     |
| Talakad (M) 2011 [31]      | Unclear |
| <b>Cueing trials</b>       |         |         |         |         |         |         |         |         |         |
| Almeida 2012 [52]          | Low     | High    | High    | Low     | High    | Low     | Low     | Unclear | Low     |
| de Bruin 2010a [53]        | Low     | Unclear | Unclear | Low     | Unclear | High    | Unclear | Unclear | Low     |
| de Bruin 2010b [54]        | Unclear |
| Haase 2011 [55]            | Low     | Unclear | Unclear | Unclear | High    | High    | Unclear | Low     | High    |
| Lehman 2005 [56]           | Low     | Unclear | Unclear | Low     | Unclear | Unclear | Unclear | Unclear | Unclear |
| Mak 2008 (M) [38]          | Low     | High    | High    | Low     | Unclear | High    | Low     | Unclear | Low     |
| Nieuwboer 2007 [57]        | Low     | Low     | High    | Low     | Low     | Low     | Low     | Unclear | Low     |
| Shankar 2008 [58]          | Low     | Low     | Unclear | Low     | Unclear | Unclear | Unclear | Unclear | Low     |
| Thaut 1996 (M) [45]        | Low     | High    | Unclear | Low     | Unclear | Unclear | Low     | Unclear | Unclear |
| <b>Dance trials</b>        |         |         |         |         |         |         |         |         |         |
| Duncan 2010 [59]           | Low     | Low     | High    | Low     | Unclear | High    | Low     | Unclear | Low     |
| Hackney 2009 (M) [60]      | Low     | High    | High    | Low     | Unclear | High    | Low     | Unclear | Low     |
| <b>Martial arts trials</b> |         |         |         |         |         |         |         |         |         |
| Hackney 2009 (M) [60]      | Low     | High    | High    | Low     | Unclear | High    | Low     | Unclear | Low     |
| Marjama-Lyons 2002 [61]    | Low     | Unclear | Unclear | Unclear | Unclear | Unclear | Low     | Unclear | Low     |
| Purchas 2007 [62]          | Unclear | Unclear | Unclear | Low     | Unclear | Low     | Unclear | Unclear | Unclear |
| Schmitz-Hubsch 2006 [60]   | Low     | High    | High    | Low     | Low     | High    | Unclear | Unclear | Unclear |

Level of risk of bias: Low risk (Low); Unclear risk (unclear); High risk (High). (M) indicates multiple arm trials which appear more than once in the table.
