# Supplementary material
Source: PubMed Central journal article supplement (PMC4790590)

**Web figure 4:** Unified Parkinson's disease rating scale – activities of daily living

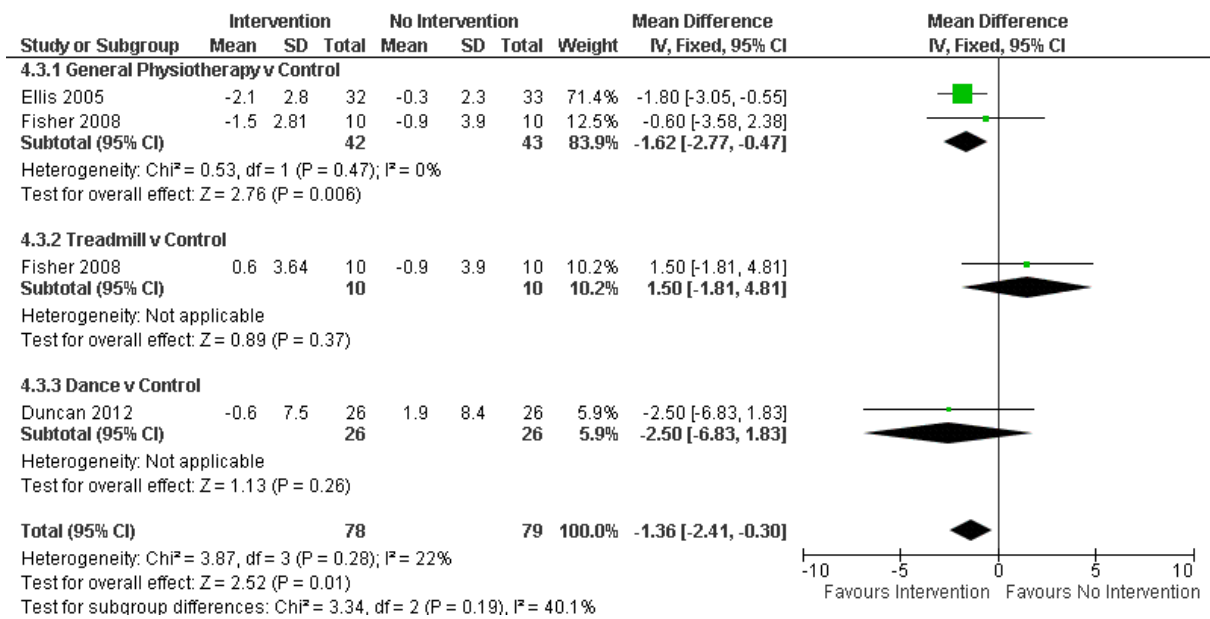

Supplement: tomc002253.wf4_default.pdf [file tomc002253.wf4_default.pdf]

**Web figure 5:** Unified Parkinson’s disease rating scale – total score

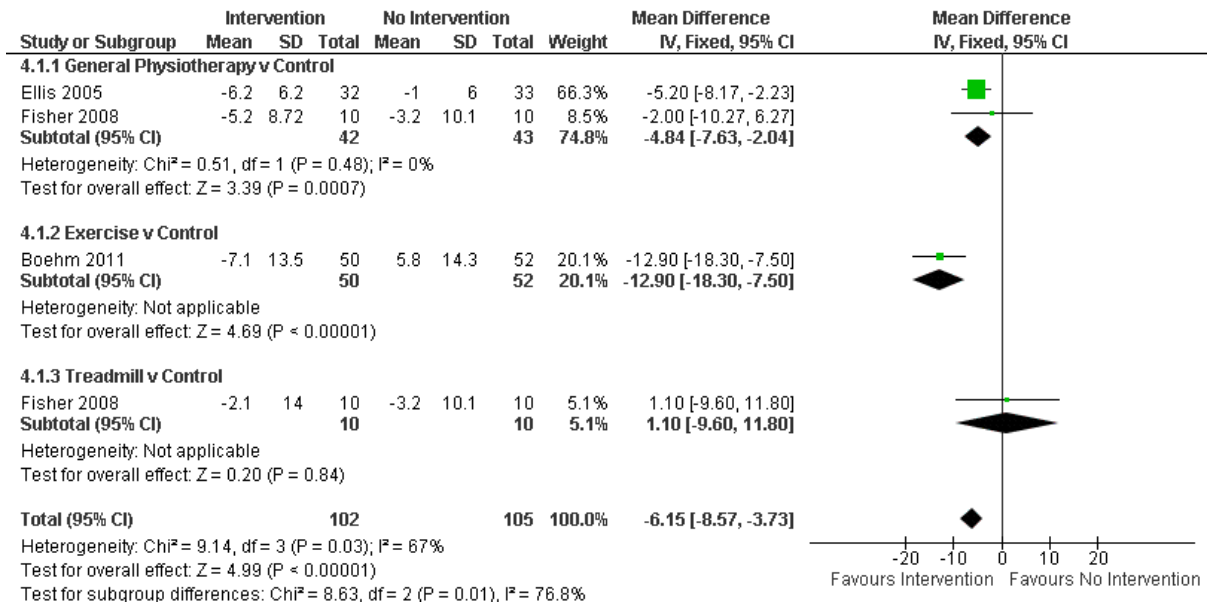

Supplement: tomc002253.wf5_default.pdf [file tomc002253.wf5_default.pdf]
